# Supplementary material for: Role of intracortical neuropil growth in the gyrification of the primate cerebral cortex
Source: PubMed Central journal article supplement — Proc Natl Acad Sci U S A. 2022 Dec 27;120(1):e2210967120. doi: 10.1073/pnas.2210967120 (PMC9910595; doi:10.1073/pnas.2210967120), 2022-12-27
Supplement: pnas.2210967120.sapp.pdf [file pnas.2210967120.sapp.pdf]

## Supporting Information for:

### **Role of intracortical neuropil growth in the gyrification of the primate cerebral cortex**

Brian G. Rash<sup>1</sup>, Jon I. Arellano<sup>1</sup>, Alvaro Duque<sup>1</sup> and Pasko Rakic<sup>1,2\*</sup>

<sup>1</sup>Department of Neuroscience and <sup>2</sup>Kavli Institute for Neuroscience at Yale  
Yale University, New Haven, CT 06520

Author for correspondence:  
Pasko Rakic  
pasko.rakic@yale.edu

#### **This PDF file includes:**

Figures S1 and S2, with legends

**A** Transcriptional profiles of Sox2<sup>+</sup> cells at E110

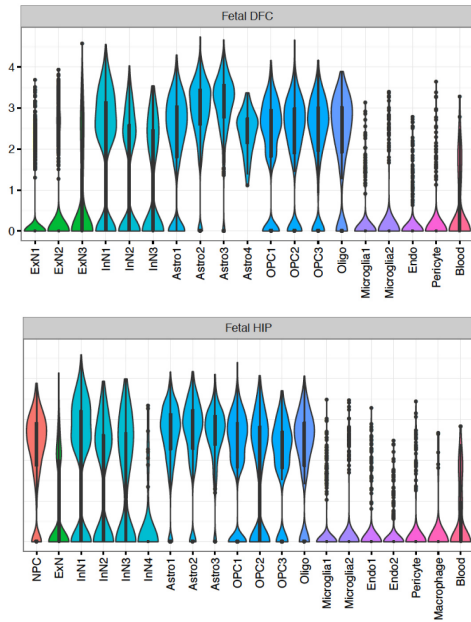

**B** Transcriptional profiles of Hopx<sup>+</sup> cells at E110

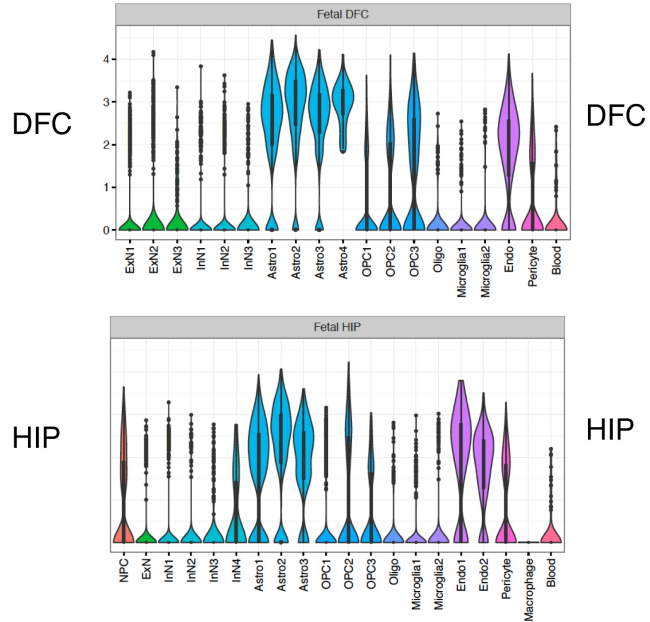

**C** Transcriptional profiles of Pax6<sup>+</sup> cells at E110

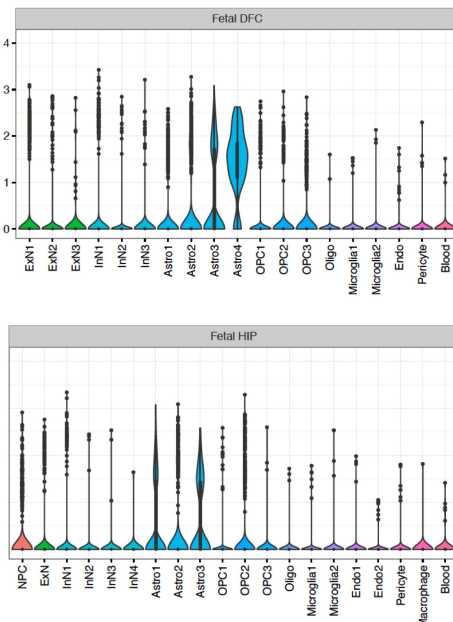

**D** Transcriptional profiles of EGFR<sup>+</sup> cells at E110

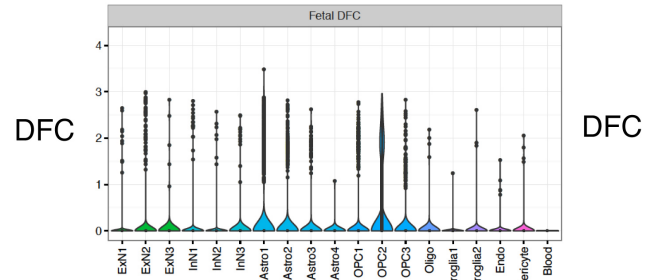

**Figure S1.** Using Psychencode, we isolated single-cell transcriptional profiles for Sox2<sup>+</sup>, Hopx<sup>+</sup>, Pax6<sup>+</sup>, or EGFR<sup>+</sup> cells recovered from DFC or hippocampus (HIP) at E110 (A-D). Sox2<sup>+</sup>, Hopx<sup>+</sup>, Pax<sup>+</sup> and EGFR<sup>+</sup> cells cluster primarily with glial cell types in DFC at this age, and the only neural progenitor cells (NPCs) showing co-clustering were in the hippocampus, where neurogenesis is known to continue.

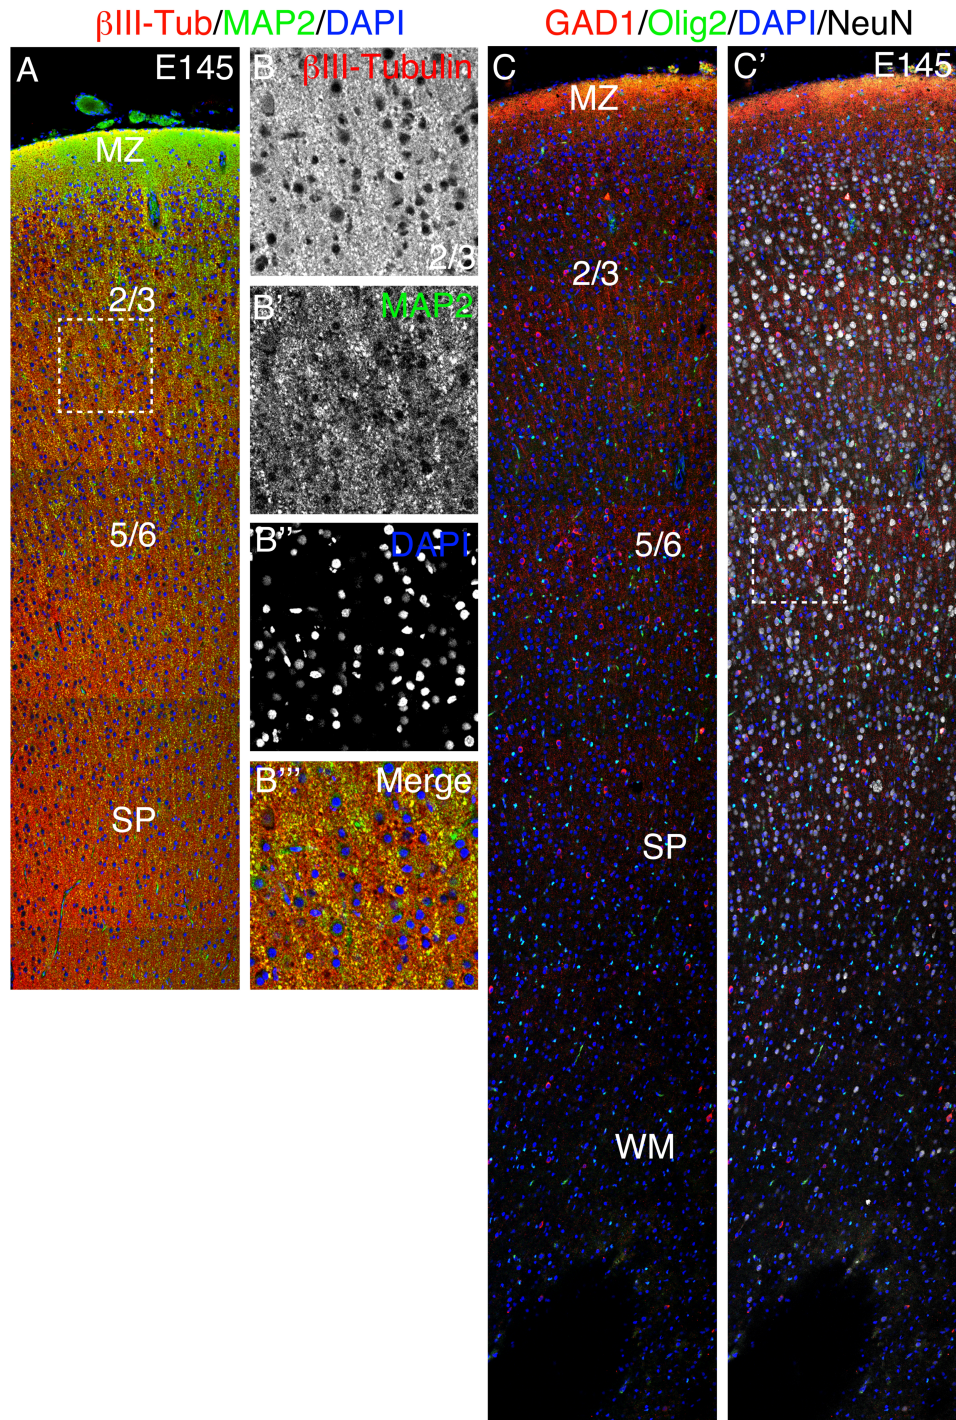

**Figure S2.** (A, B) Neuropil labeling by  $\beta$ -III tubulin and MAP2 in dorsal parietal monkey cerebral cortex at E145. Overall cellular density continues to decline at this stage, and the majority of the space between nuclei (DAPI; B'') is occupied by cellular processes expressing the neuronal markers,  $\beta$ -III tubulin and MAP2 (B'''). (C) Coronal sections of dorsal parietal macaque cerebrum immunostained for NeuN, GAD1, and Olig2 demonstrate significant numbers of Olig2+ immature glial cells invading the superficial and deep cortical layers, as well as the presence of large numbers of GAD1+ interneurons (C'').
